# Supplementary material for: Nanocomposite membranes of sulfonated poly(phthalalizinone ether ketone)–sulfonated graphite nanofibers as electrolytes for direct methanol fuel cells
Source: Royal Society of Chemistry journal article supplement (doi:10.1039/c6ra23510g), 2016-01-01
Supplement: c6ra23510g1.pdf [file c6ra23510g1.pdf]

### Supplementary data

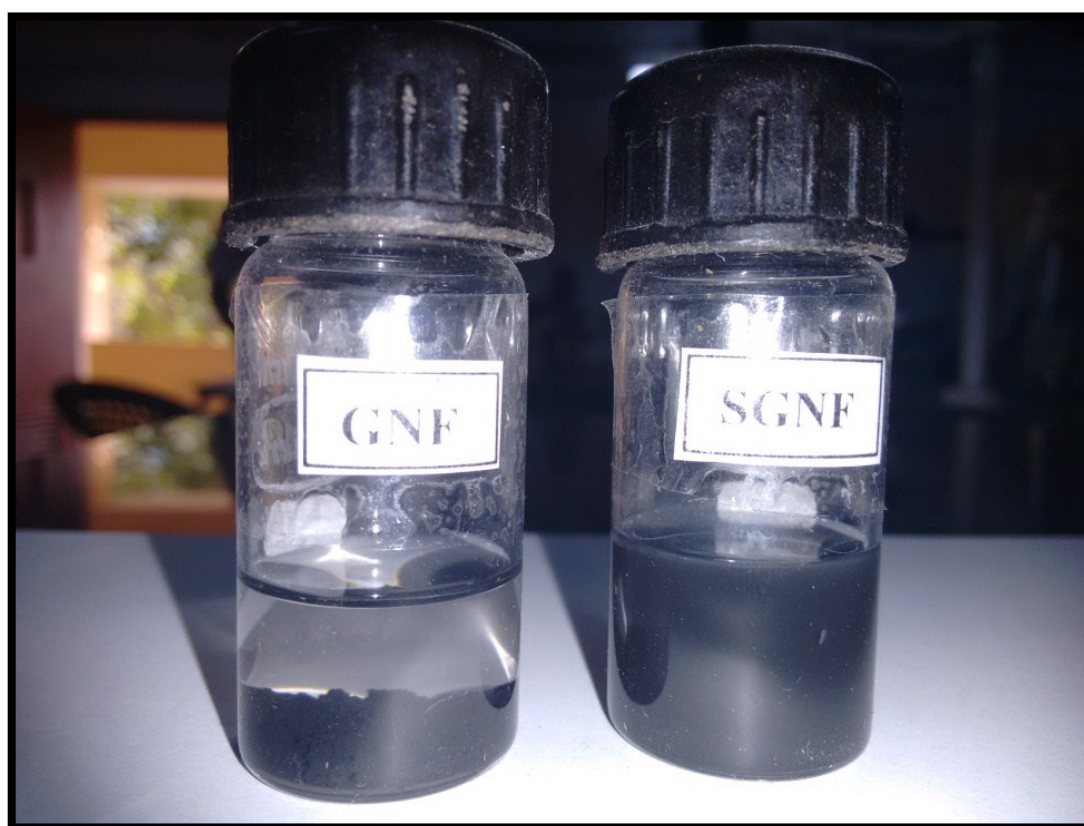

**Fig. S1.** Dispersion of GNF and SGNF in water

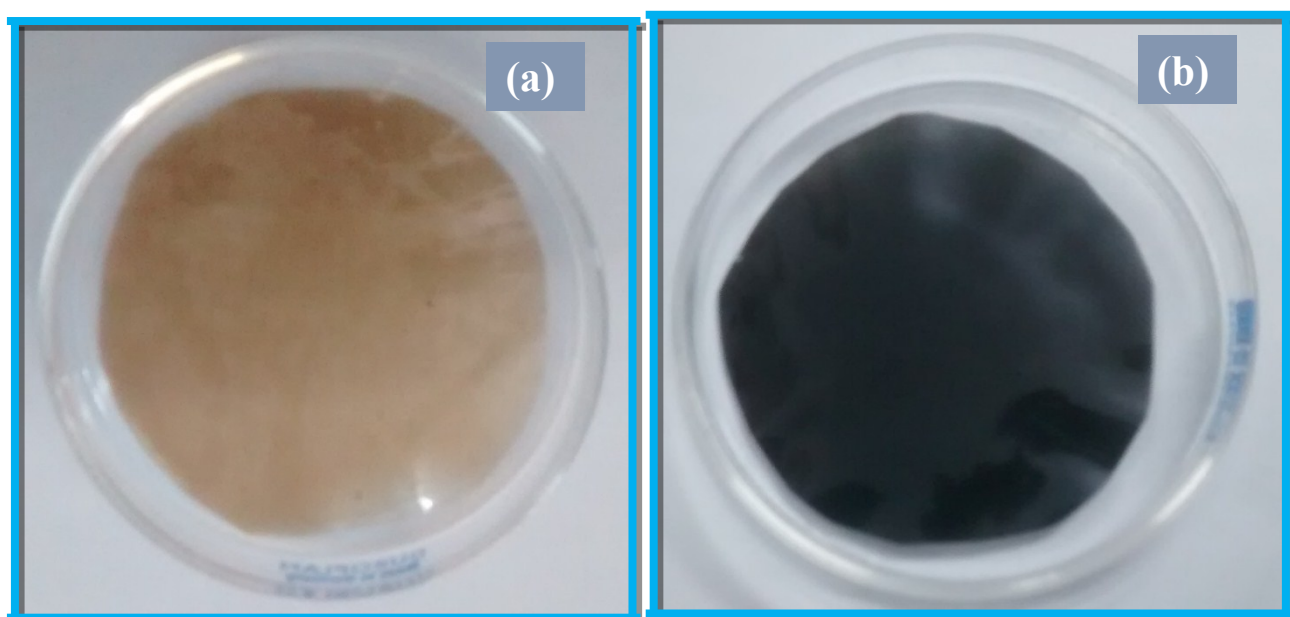

**Fig. S2.** Photographs of prepared membranes (a) Pristine SPPK and (b) SPPEK-SGNF.

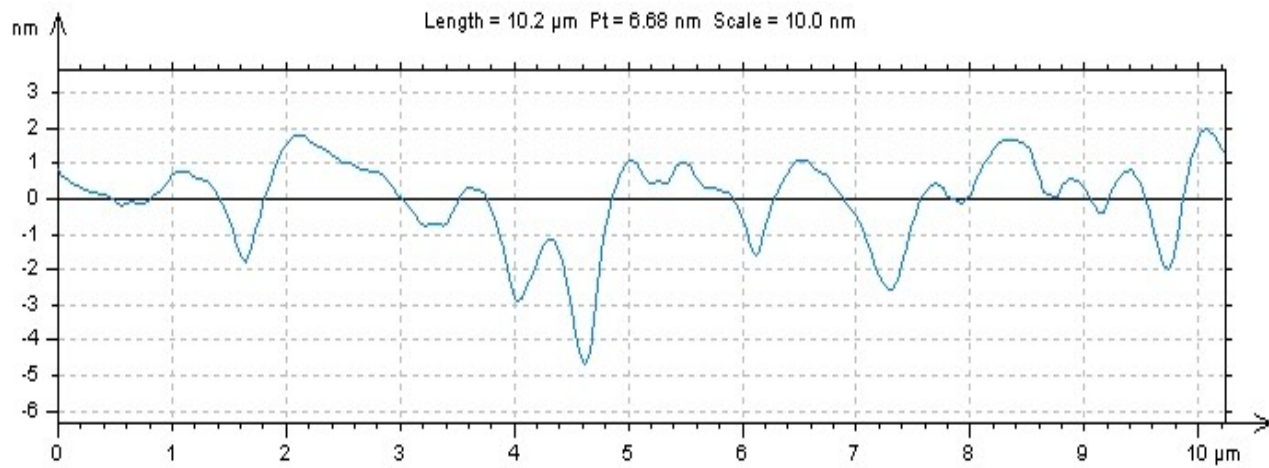

**Fig.S3.** AFM surface roughness profile for (a) Pristine SPPEK and (b) SPPEK-SGNF (0.5 wt.%).
